# Supplementary material for: Effectiveness and toxicity of adjuvant chemotherapy in patients with non-small cell lung cancer
Source: PubMed Central journal article supplement — J Bras Pneumol. 2021 May-Jun;47(3):e20200378. doi: 10.36416/1806-3756/e20200378 (PMC8332712; doi:10.36416/1806-3756/e20200378), 2021
Supplement: 1806-3756-jbpneu-47-03-e20200378-suppl1.pdf [file 1806-3756-jbpneu-47-03-e20200378-suppl1.pdf]

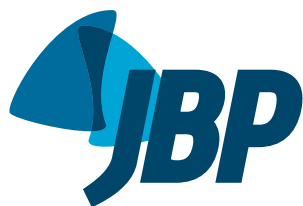

# Effectiveness and toxicity of adjuvant chemotherapy in patients with non-small cell lung cancer

Guilherme Harada<sup>1</sup>, Maria Fernanda Batistuzzo Vicentini Neffa<sup>1</sup>,  
 Renata Colombo Bonadio<sup>1</sup>, Elizabeth Zambrano Mendoza<sup>1</sup>,  
 Rafael Caparica<sup>2</sup>, Letícia Leone Lauricella<sup>1</sup>, Teresa Yae Takagaki<sup>1</sup>,  
 Felipe Santa Rosa Roitberg<sup>1</sup>, Ricardo Mingarini Terra<sup>1</sup>, Gilberto De Castro Jr<sup>1</sup>

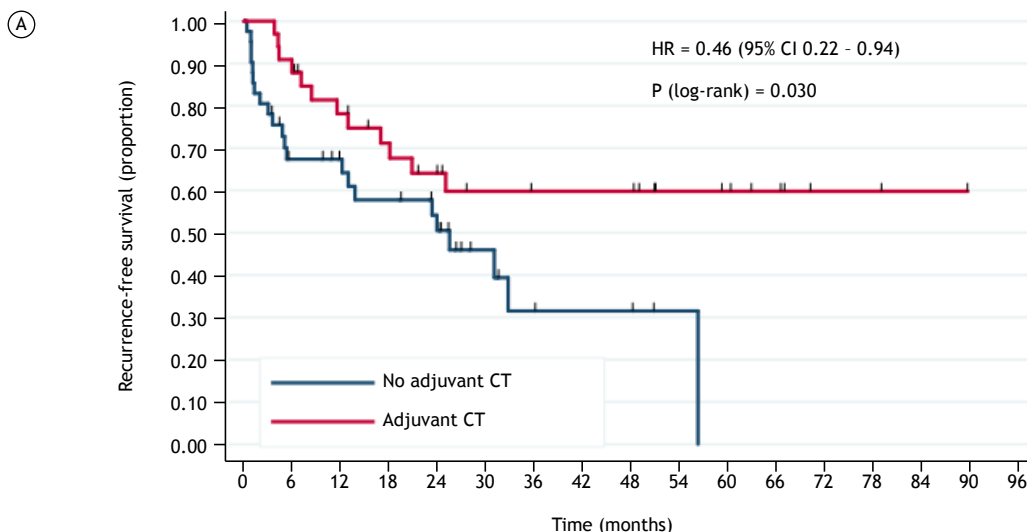

| Number at risk | 0  | 6  | 12 | 18 | 24 | 30 | 36 | 42 | 48 | 54 | 60 | 66 | 72 | 78 | 84 | 90 | 96 |
|----------------|----|----|----|----|----|----|----|----|----|----|----|----|----|----|----|----|----|
| No adjuvant CT | 41 | 24 | 21 | 18 | 14 | 7  | 4  | 3  | 3  | 1  | 0  | 0  | 0  | 0  | 0  | 0  | 0  |
| Adjuvant CT    | 33 | 28 | 24 | 20 | 16 | 13 | 12 | 12 | 12 | 8  | 7  | 5  | 2  | 2  | 1  | 0  | 0  |

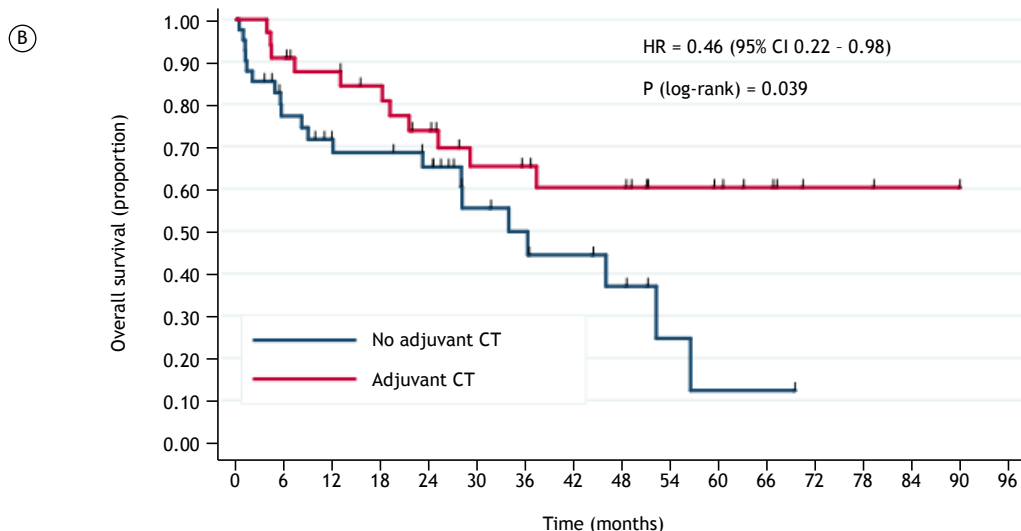

| Number at risk | 0  | 6  | 12 | 18 | 24 | 30 | 36 | 42 | 48 | 54 | 60 | 66 | 72 | 78 | 84 | 90 | 96 |
|----------------|----|----|----|----|----|----|----|----|----|----|----|----|----|----|----|----|----|
| No adjuvant CT | 41 | 28 | 22 | 22 | 19 | 11 | 9  | 7  | 5  | 2  | 1  | 1  | 0  | 0  | 0  | 0  | 0  |
| Adjuvant CT    | 33 | 29 | 27 | 24 | 19 | 15 | 14 | 12 | 12 | 8  | 7  | 5  | 2  | 2  | 1  | 0  | 0  |

**Figure S1.** Recurrence-free survival (A) and overall survival (B) curves in patients with stage II non-small cell lung cancer, comparing those treated with cisplatin + vinorelbine with those not treated with adjuvant chemotherapy (controls). HR: hazard ratio; and CT: chemotherapy.

(A)

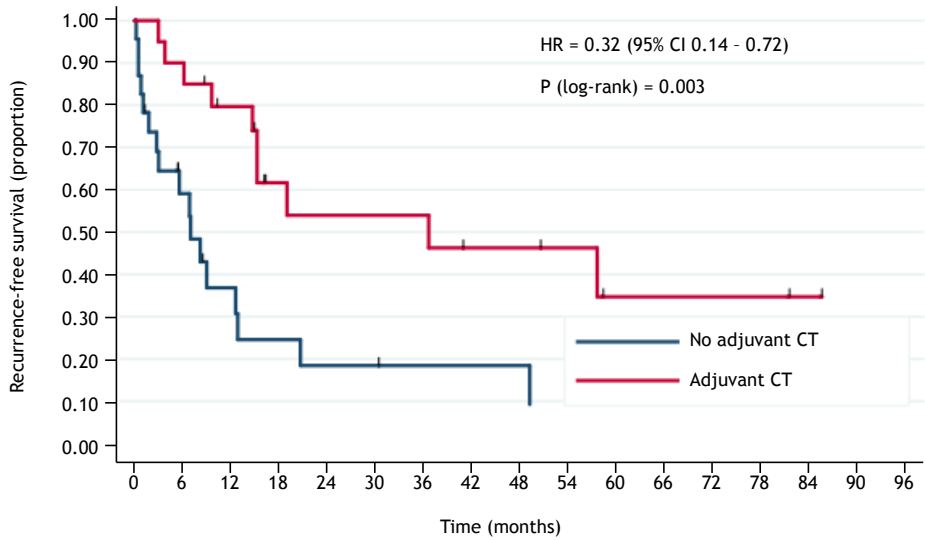

| Number at risk | 0  | 6  | 12 | 18 | 24 | 30 | 36 | 42 | 48 | 54 | 60 | 66 | 72 | 78 | 84 | 90 | 96 |
|----------------|----|----|----|----|----|----|----|----|----|----|----|----|----|----|----|----|----|
| No adjuvant CT | 23 | 11 | 6  | 4  | 3  | 3  | 2  | 2  | 2  | 1  | 1  | 1  | 1  | 1  | 1  | 1  | 1  |
| Adjuvant CT    | 20 | 18 | 14 | 8  | 7  | 7  | 7  | 5  | 5  | 4  | 2  | 2  | 2  | 2  | 1  | 0  | 0  |

(B)

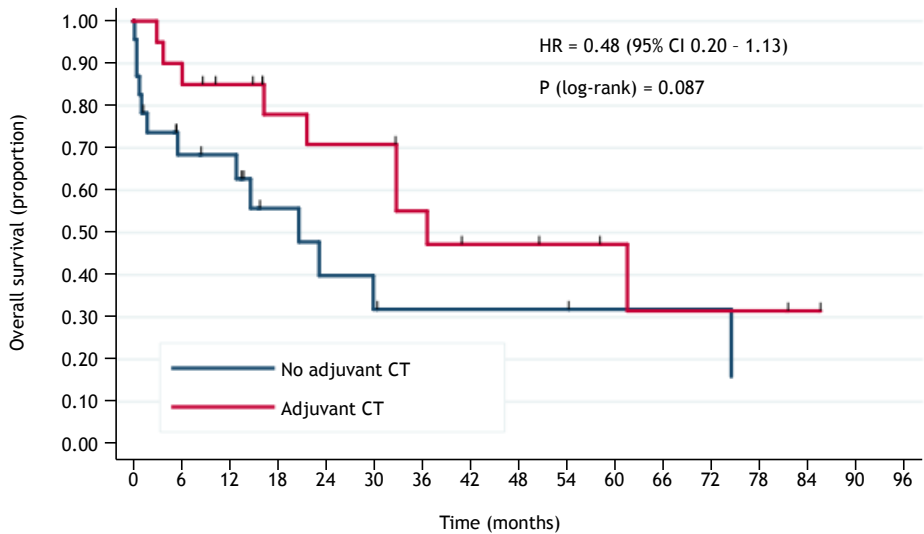

| Number at risk | 0  | 6  | 12 | 18 | 24 | 30 | 36 | 42 | 48 | 54 | 60 | 66 | 72 | 78 | 84 | 90 | 96 |
|----------------|----|----|----|----|----|----|----|----|----|----|----|----|----|----|----|----|----|
| No adjuvant CT | 23 | 13 | 12 | 7  | 5  | 4  | 3  | 3  | 3  | 3  | 2  | 2  | 2  | 1  | 1  | 1  | 1  |
| Adjuvant CT    | 20 | 18 | 15 | 11 | 10 | 10 | 7  | 5  | 5  | 4  | 3  | 2  | 2  | 2  | 1  | 0  | 0  |

**Figure S2.** Recurrence-free survival (A) and overall survival (B) curves in patients with stage III non-small cell lung cancer, comparing those treated with cisplatin + vinorelbine with those not treated with adjuvant chemotherapy (controls). HR: hazard ratio; and CT: chemotherapy.
